# Supplementary material for: Oral administration of Lactobacillus fermentum CRL1446 improves biomarkers of metabolic syndrome in mice fed a high-fat diet supplemented with wheat bran
Source: Royal Society of Chemistry journal article supplement (doi:10.1039/d0fo00730g), 2020-01-01
Supplement: d0fo00730g2.pdf [file d0fo00730g2.pdf]

## Supplementary material

**Table S1: Nutritional composition of diets for mice**

|                    | Normal diet               | **HFD+WB                  |
|--------------------|---------------------------|---------------------------|
| *Moisture (g)      | 9.89 ± 0.14 <sup>a</sup>  | 5.95 ± 0.13 <sup>b</sup>  |
| *Ash (g)           | 4.57 ± 0.20 <sup>a</sup>  | 3.04 ± 0.19 <sup>b</sup>  |
| *Proteins (g)      | 23.50 ± 0.06 <sup>a</sup> | 22.15 ± 0.08 <sup>b</sup> |
| *Total Lipids (g)  | 7.89 ± 0.19 <sup>a</sup>  | 13.20 ± 0.17 <sup>b</sup> |
| *Carbohydrates (g) | 38.00 ± 1.55 <sup>a</sup> | 40.00 ± 0.65 <sup>a</sup> |
| Kcal/g             | 3.10                      | 5.10                      |

\*Amounts expressed per 100 g of diet.

\*\* High-fat diet supplemented with wheat bran to 7% (w/w).
