# Supplementary material for: Oral administration of Lactobacillus fermentum CRL1446 improves biomarkers of metabolic syndrome in mice fed a high-fat diet supplemented with wheat bran
Source: Royal Society of Chemistry journal article supplement (doi:10.1039/d0fo00730g), 2020-01-01
Supplement: d0fo00730g3.pdf [file d0fo00730g3.pdf]

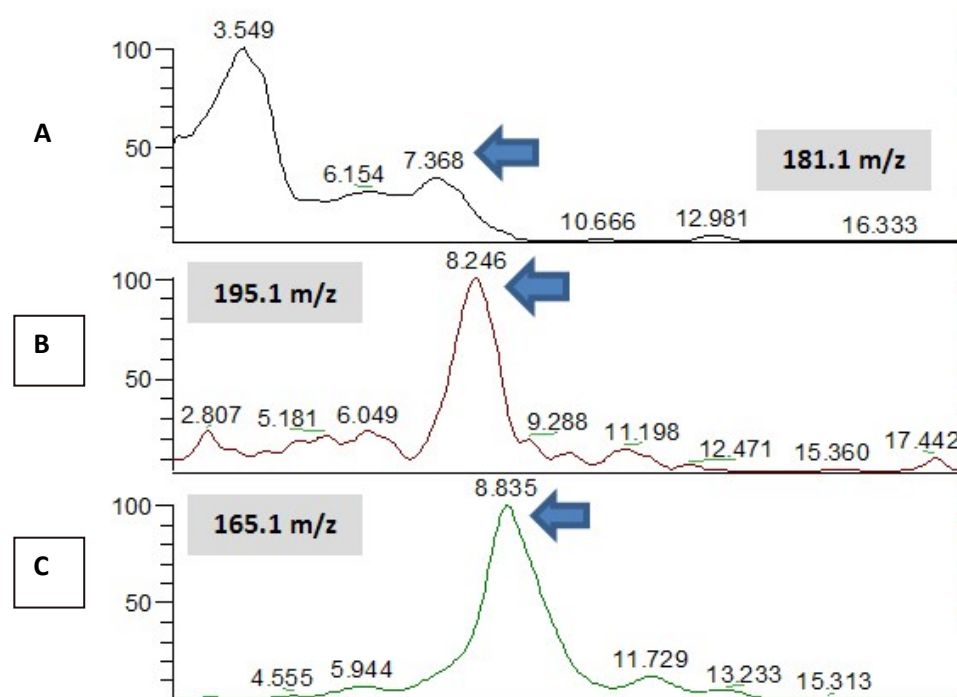

**Figure S1:** Chromatograms obtained by HPLC-MS after injection of a sample from the MS+Lf group. According to the mass/charge ratio [m/z] of the ionic species detected and the retention times [RT] (blue arrows) the presence of the following metabolites derived from ferulic acid was confirmed: (A) dihydroxyphenylpropionic acid [DHPPA]; (B) dihydroferulic acid [DHF] and (C) hydroxyphenylpropionic acid [HPPA].
